# Supplementary material for: Designing a 3D Printing Based Auxetic Cardiac Patch with hiPSC-CMs for Heart Repair
Source: MDPI journal article supplement (doi:10.3390/jcdd8120172), 2021-12-03
Supplement: s1 [file s1]

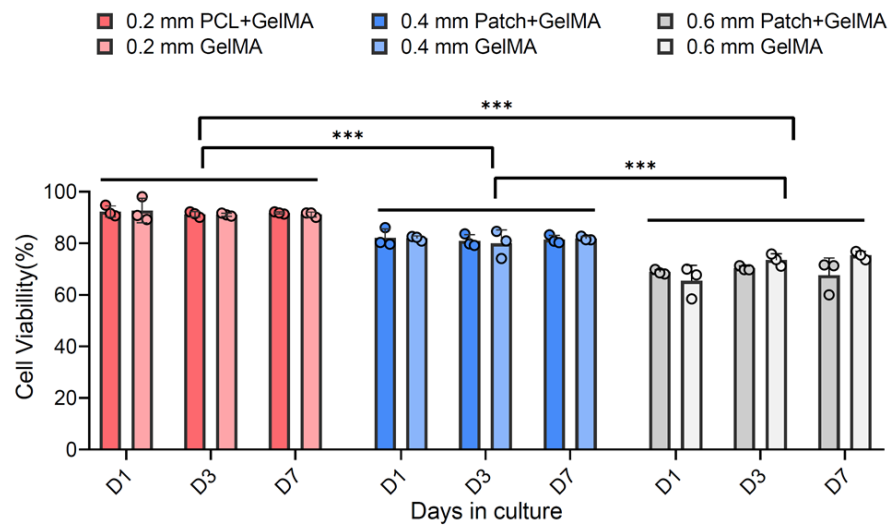

Figure S1: Cell viability following 7-day culture in auxetic cardiac patches.

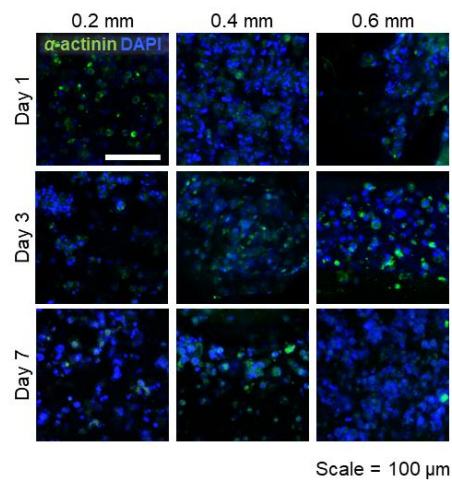

Figure S2: Immunofluorescent staining for  $\alpha$ -actinin after day 1, 3, and 7 in the patches.
